# Supplementary material
Source: MDPI journal article supplement (https://www.mdpi.com/2073-4441/14/22/3775)
Supplement: s1 [file s1]

## Supporting Information

### **Effect of medium pressure ultraviolet/chlorine advanced oxidation on the production of disinfection by-products from seven model benzene precursors**

Wanting Li <sup>a</sup>, Shihu Shu<sup>#a</sup>, Yanping Zhu<sup>a,\*</sup>, Linjing Wu <sup>a</sup>, Qiongfang Wang <sup>b</sup>, Naiyun Gao <sup>c</sup>

<sup>a</sup> College of Environmental Science and Engineering, Donghua University, Shanghai 201620, China

<sup>b</sup> College of Chemistry and Chemical Engineering, Shanghai University of Engineering Science, Shanghai 201600, China

<sup>c</sup> State Key Laboratory of Pollution Control Reuse, Tongji University, Shanghai 200092, China

\*Corresponding author.

E-mail: yanpingzhu@dhu.edu.cn

#### **Lists of Captions**

|                                                                                                                                                                  |   |
|------------------------------------------------------------------------------------------------------------------------------------------------------------------|---|
| <b>Supporting Information</b> .....                                                                                                                              | 1 |
| <b>Effect of medium pressure ultraviolet/chlorine advanced oxidation on the production of disinfection by-products from seven model benzene precursors</b> ..... | 1 |
| <b>Table S1. Chlorine decay during 60 s pre-oxidation of the seven model compounds</b> .....                                                                     | 2 |
| <b>Figure S1. Schematic diagram of the ultraviolet collimated beam apparatus (a) and spectrogram of a medium-pressure mercury lamp (b)</b> .....                 | 3 |

## Supporting Information

**Table S1. Chlorine decay during 60 s pre-oxidation of the seven model compounds.**

| Model<br>precursors | pH 6 (mg Cl/mg C)     |                    |                       |                    | pH 8 (mg Cl/mg C)     |                    |                       |                    |
|---------------------|-----------------------|--------------------|-----------------------|--------------------|-----------------------|--------------------|-----------------------|--------------------|
|                     | Ambient               |                    | Bromide-spiked        |                    | Ambient               |                    | Bromide-spiked        |                    |
|                     | Cl <sub>2</sub> alone | UV/Cl <sub>2</sub> |
| BA                  | 0.05                  | 0.37               | 0.01                  | 0.38               | 0.02                  | 0.96               | 0.01                  | 0.98               |
| NB                  | 0.01                  | 0.33               | 0.01                  | 0.30               | 0.01                  | 0.63               | 0.01                  | 0.66               |
| PN                  | 0.13                  | 0.93               | 0.12                  | 0.98               | 0.2                   | 1.34               | 0.24                  | 1.47               |
| RSC                 | 3.34                  | 3.38               | 3.30                  | 3.37               | 3.30                  | 3.37               | 3.30                  | 3.37               |
| 2-MCP               | 0.23                  | 1.07               | 0.53                  | 1.37               | 0.27                  | 1.53               | 0.55                  | 1.65               |
| 4-MCP               | 0.10                  | 1.33               | 0.08                  | 1.57               | 0.13                  | 1.73               | 0.17                  | 1.83               |
| 2,4,6-TCP           | 0.20                  | 0.70               | 0.23                  | 1.37               | 0.17                  | 1.15               | 0.21                  | 1.37               |

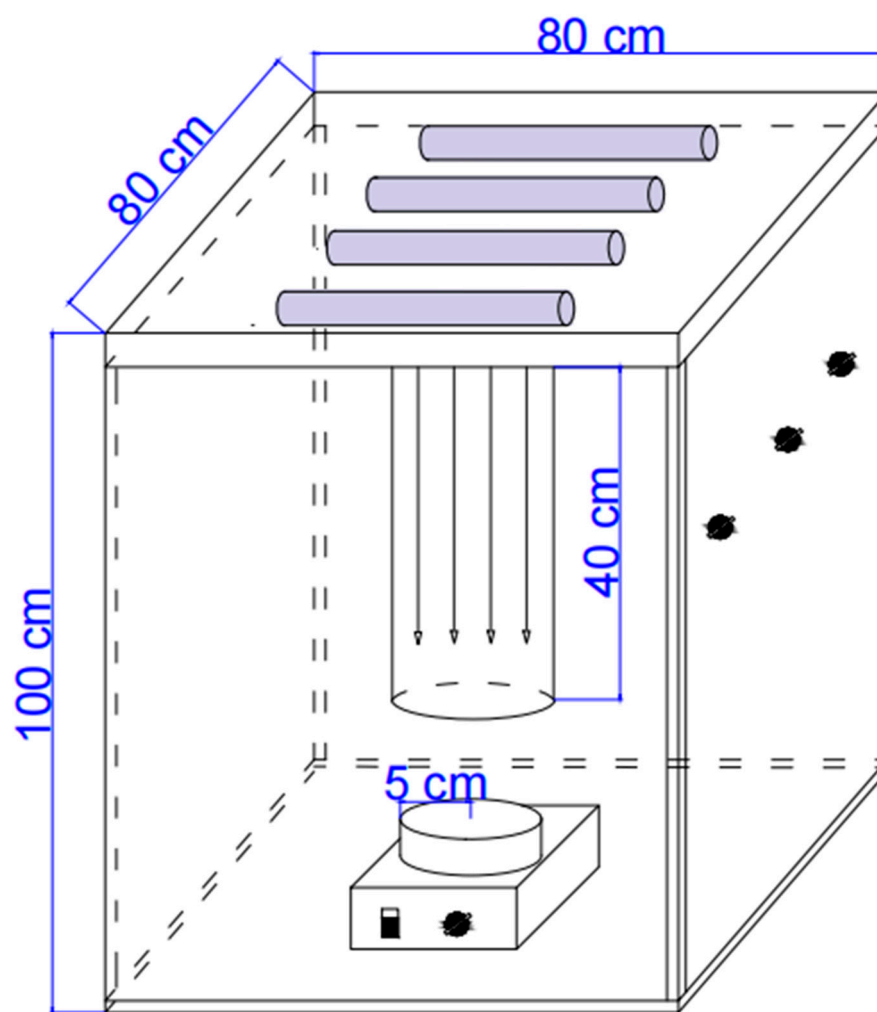

(a)

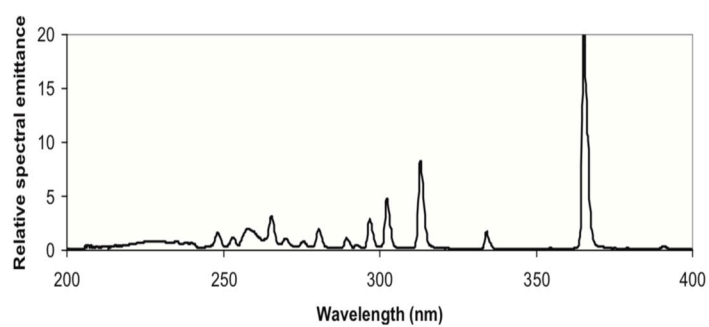

(b)

**Figure S1.** Schematic diagram of the ultraviolet collimated beam apparatus (a) and spectrogram of a medium-pressure mercury lamp (b).
